# Supplementary material
Source: MDPI journal article supplement (https://www.mdpi.com/2077-0472/13/3/714)
Supplement: s1 [file s1 › agriculture-2189934-supplementary.pdf]

# User Chromatograms

Fragmentor Voltage

Collision Energy

0

Ionization Mode

EI

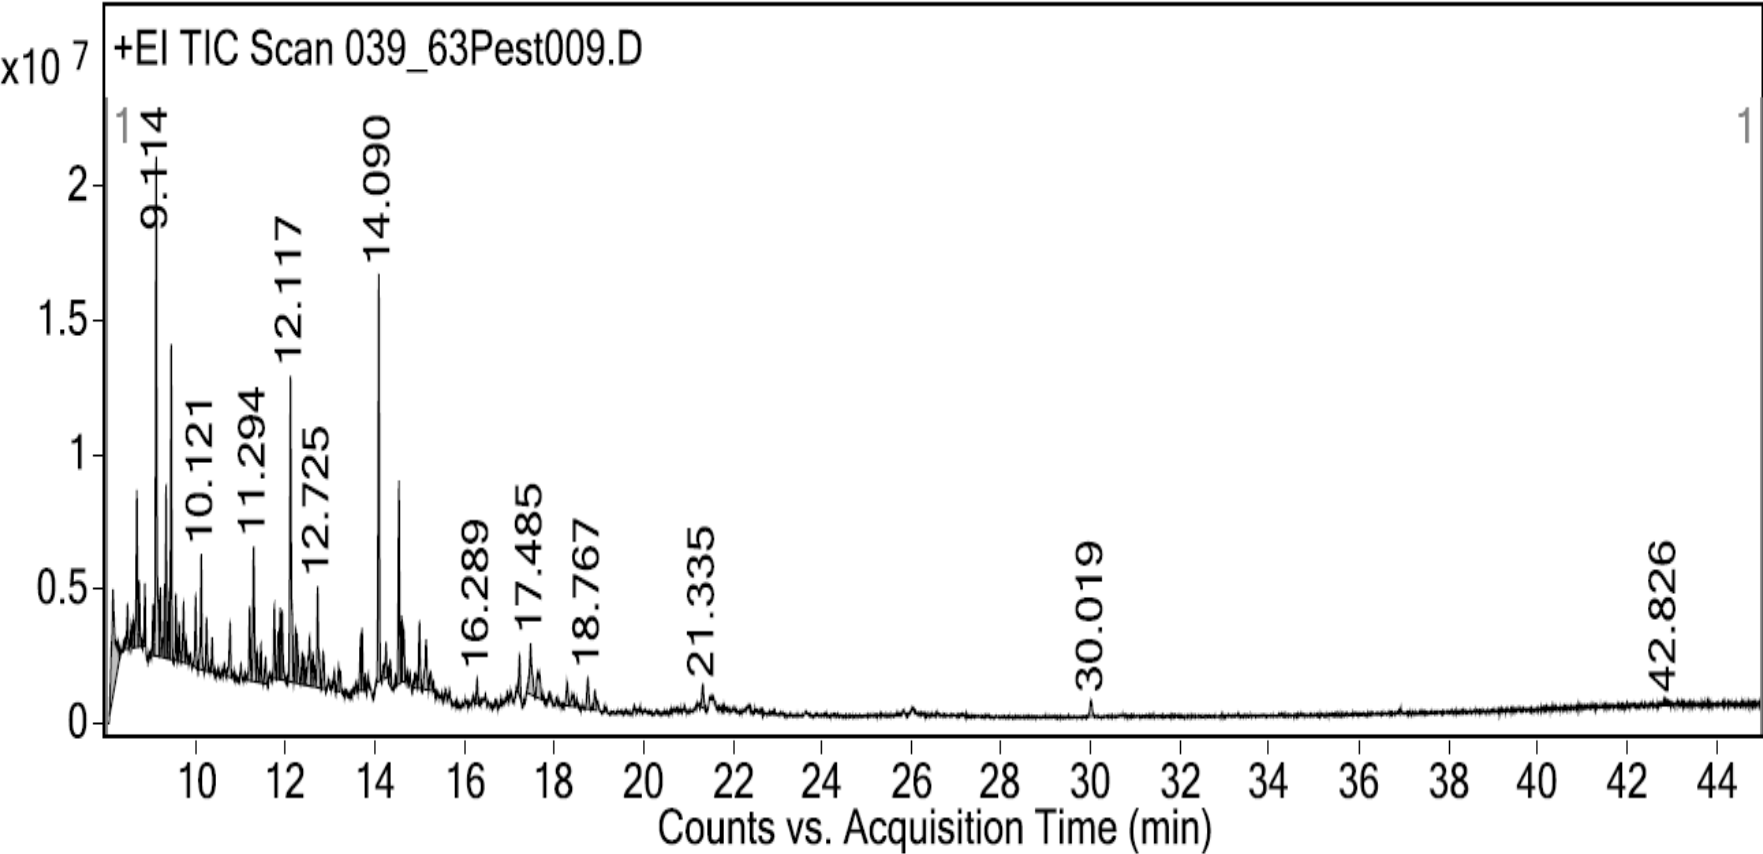

**Supplementary Figure S1** Selected chromatograms of blank extraction of *Brassica Chinensis* Linn. Sample. Numbers in X-axis indicates retention time in minutes.

## User Chromatograms

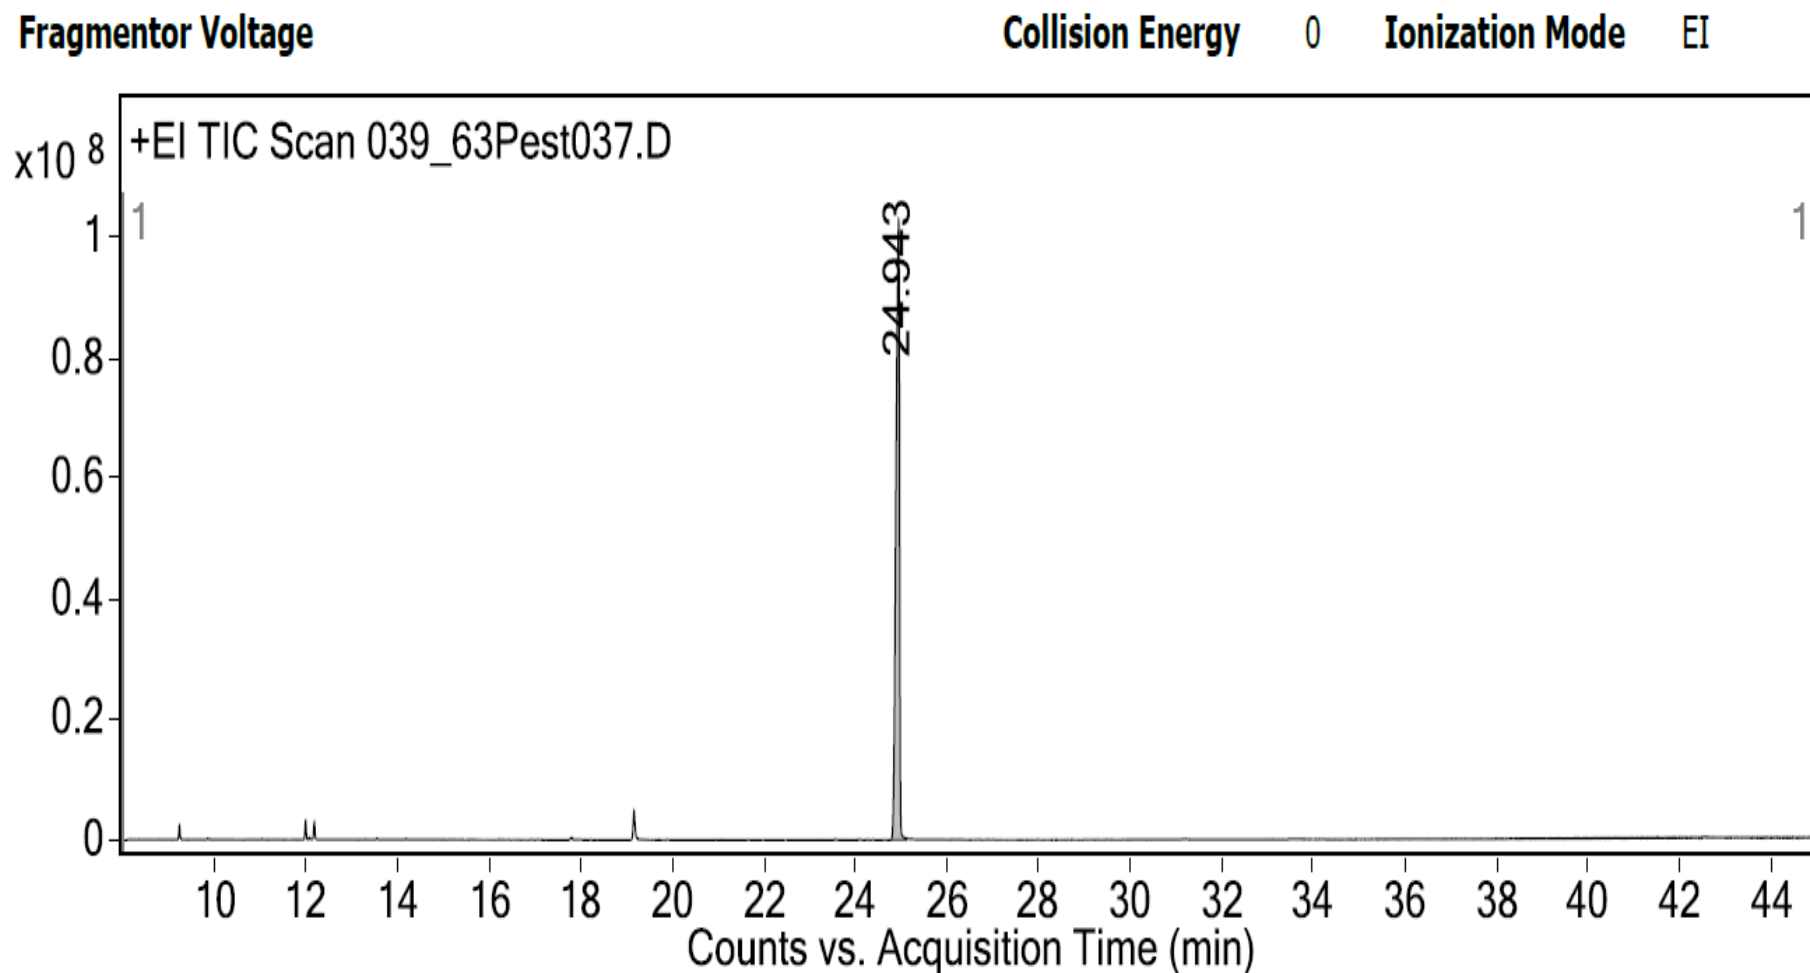

**Supplementary Figure S2** Selected chromatogram eluted by GC/MS for standard Chlorpyrifos® 2 ppm solution [30,31]. One major eluted peak showed Chlorpyrifos® elution. Numbers in X- axis indicates retention time in minutes. Certified Chlorpyrifos® standard traceable to the US Environmental Protection Agency Pesticide Repository (Fort Meade, MD, USA).

# User Chromatograms

Fragmentor Voltage

Collision Energy

0

Ionization Mode

EI

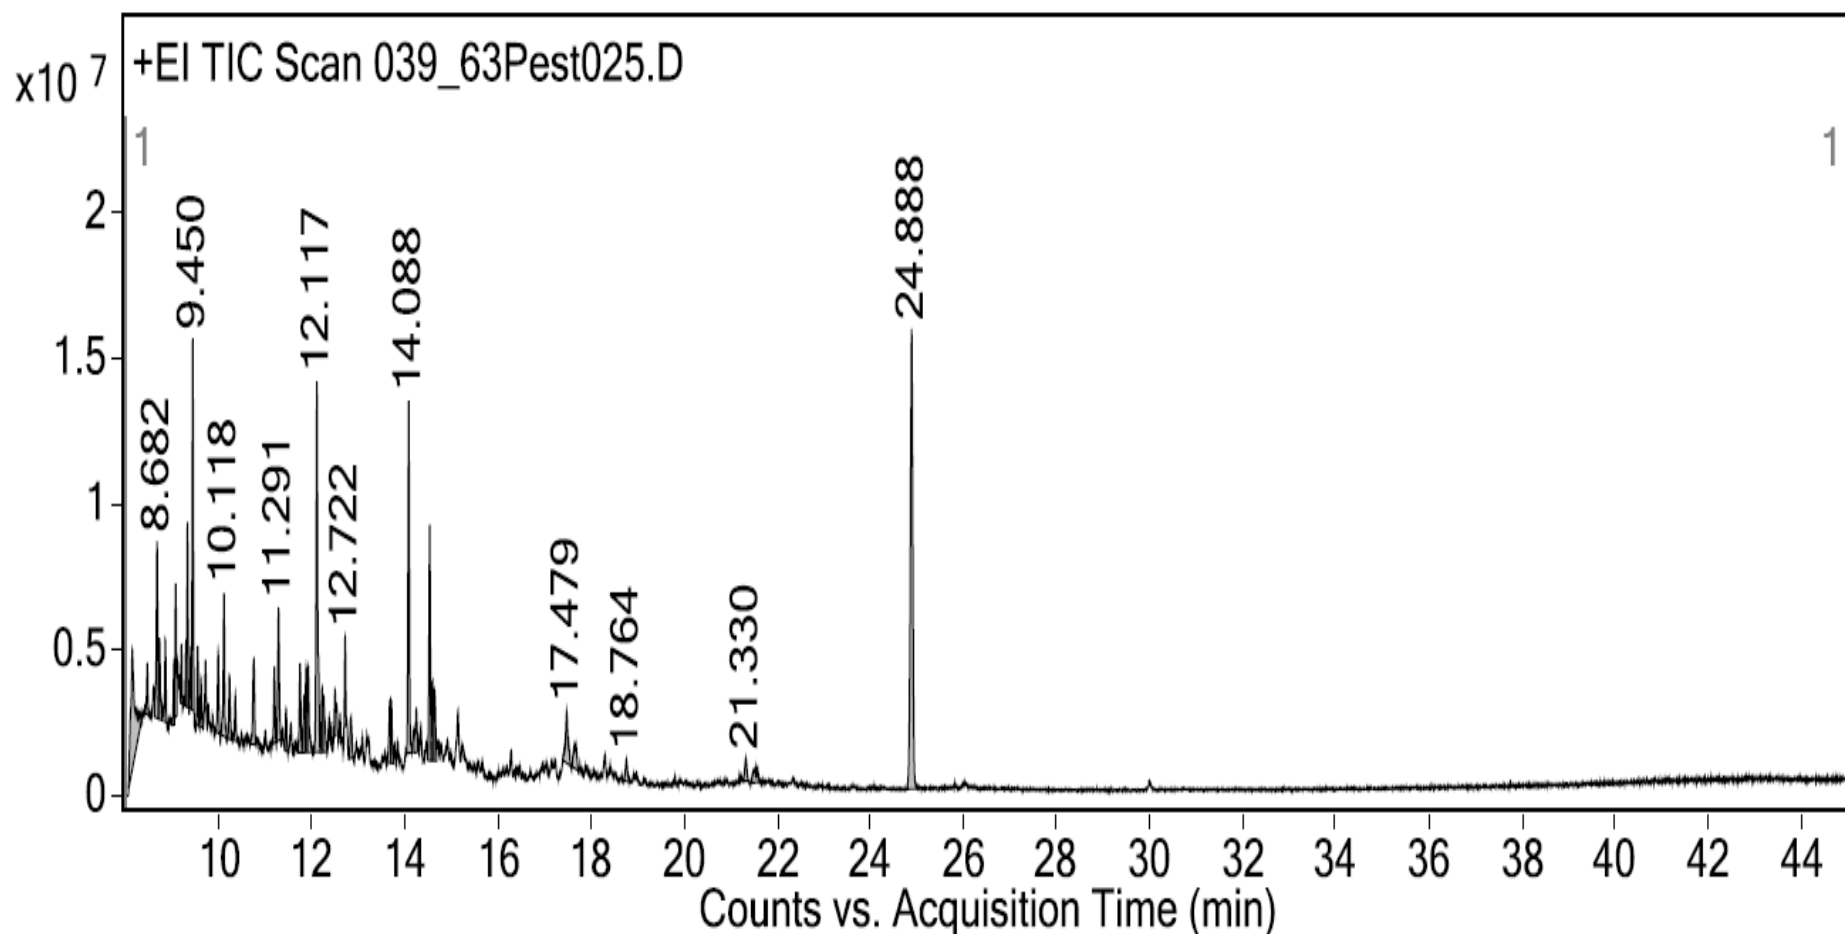

**Supplementary Figure S3** Selected chromatogram of extraction of *Brassica Chinensis* Linn. Sample washed by tap water (TW). Numbers in X-axis indicates retention time in minutes.

# User Chromatograms

Fragmentor Voltage

Collision Energy 0

Ionization Mode EI

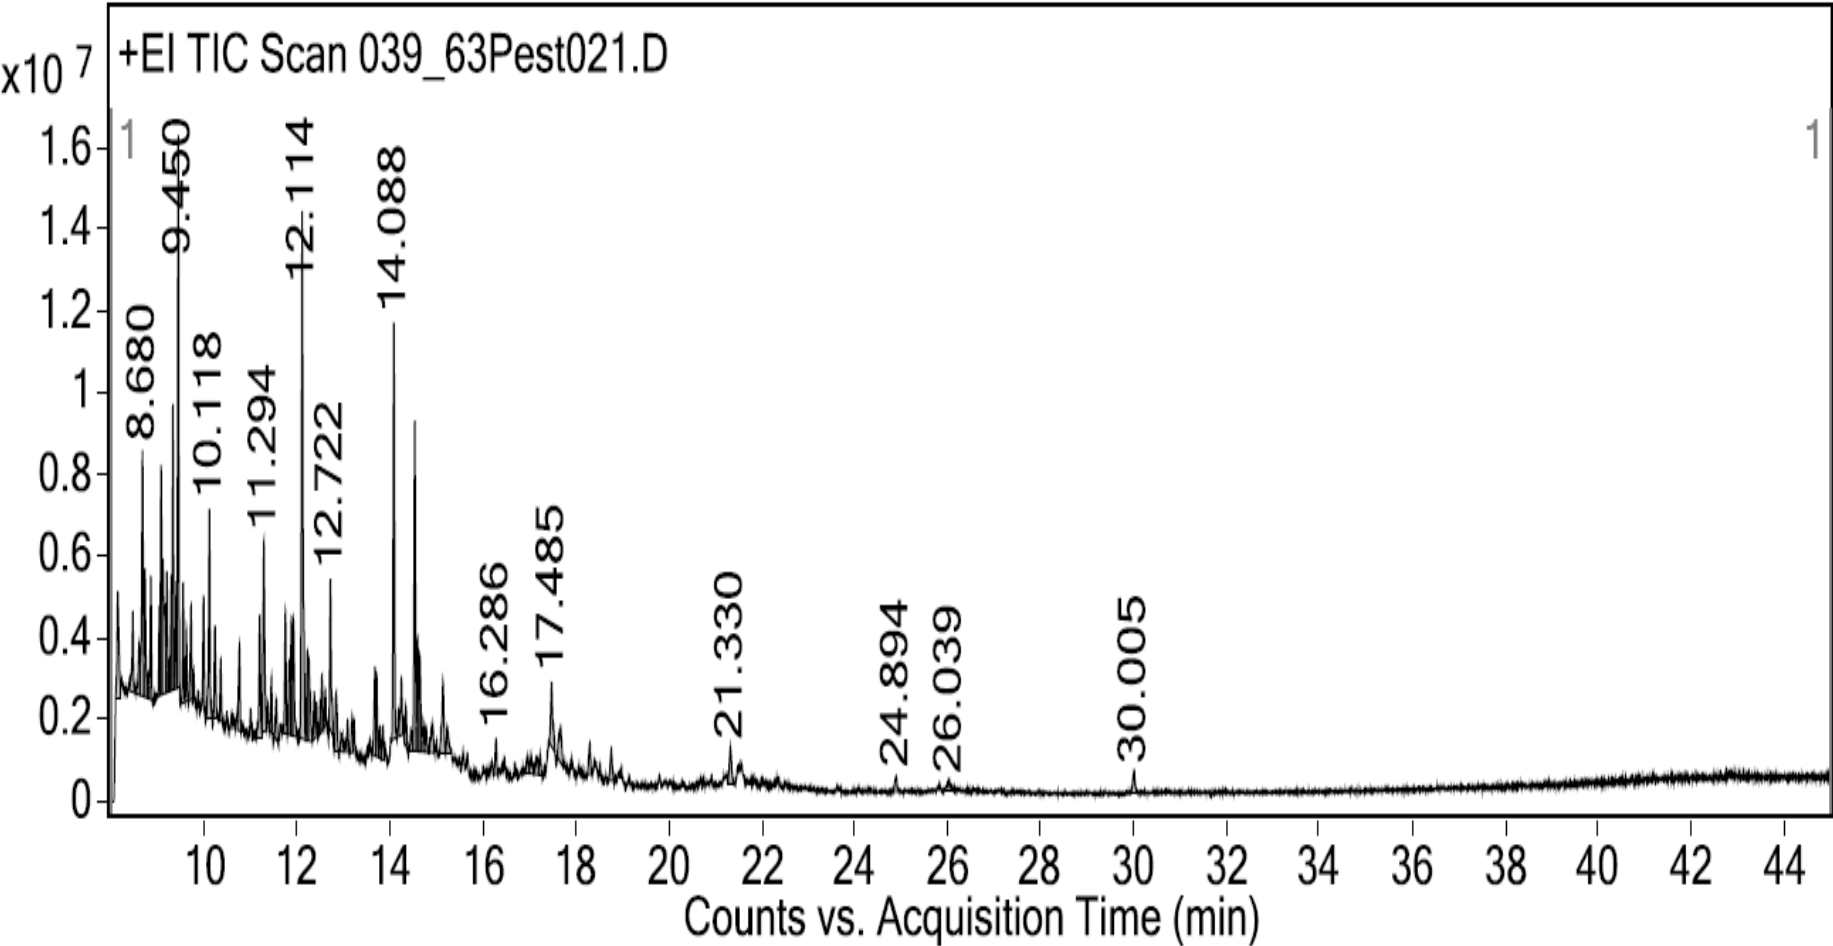

**Supplementary Figure S4** Selected chromatogram of extraction of *Brassica Chinensis* Linn. Sample washed by magnetically treated water (MTW). Numbers in X- axis indicates retention time in minutes.
